# Supplementary material
Source: PubMed Central journal article supplement (PMC7237788)
Supplement: AEM.02863-19-s0001.pdf [file AEM.02863-19-s0001.pdf]

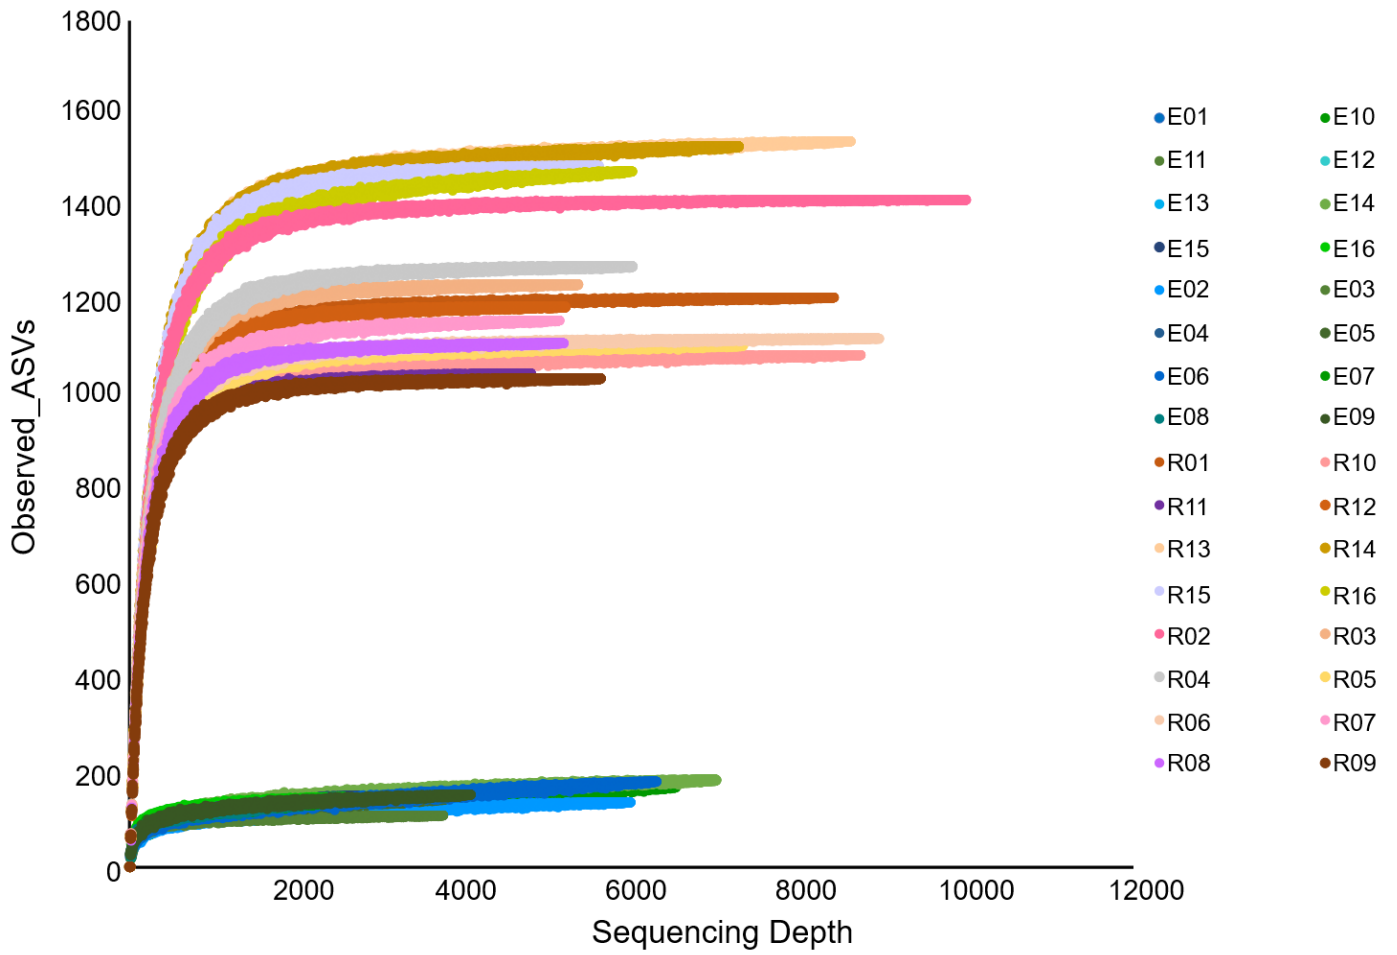

**Figure S1** Rarefaction curves of 16 individual *A. sparsifolia* plants per plant compartment. Rarefaction curves were generated showing the number of amplicon sequence variant (ASVs). R01–16 represent rhizosphere samples and E01–16 represent root endosphere samples.

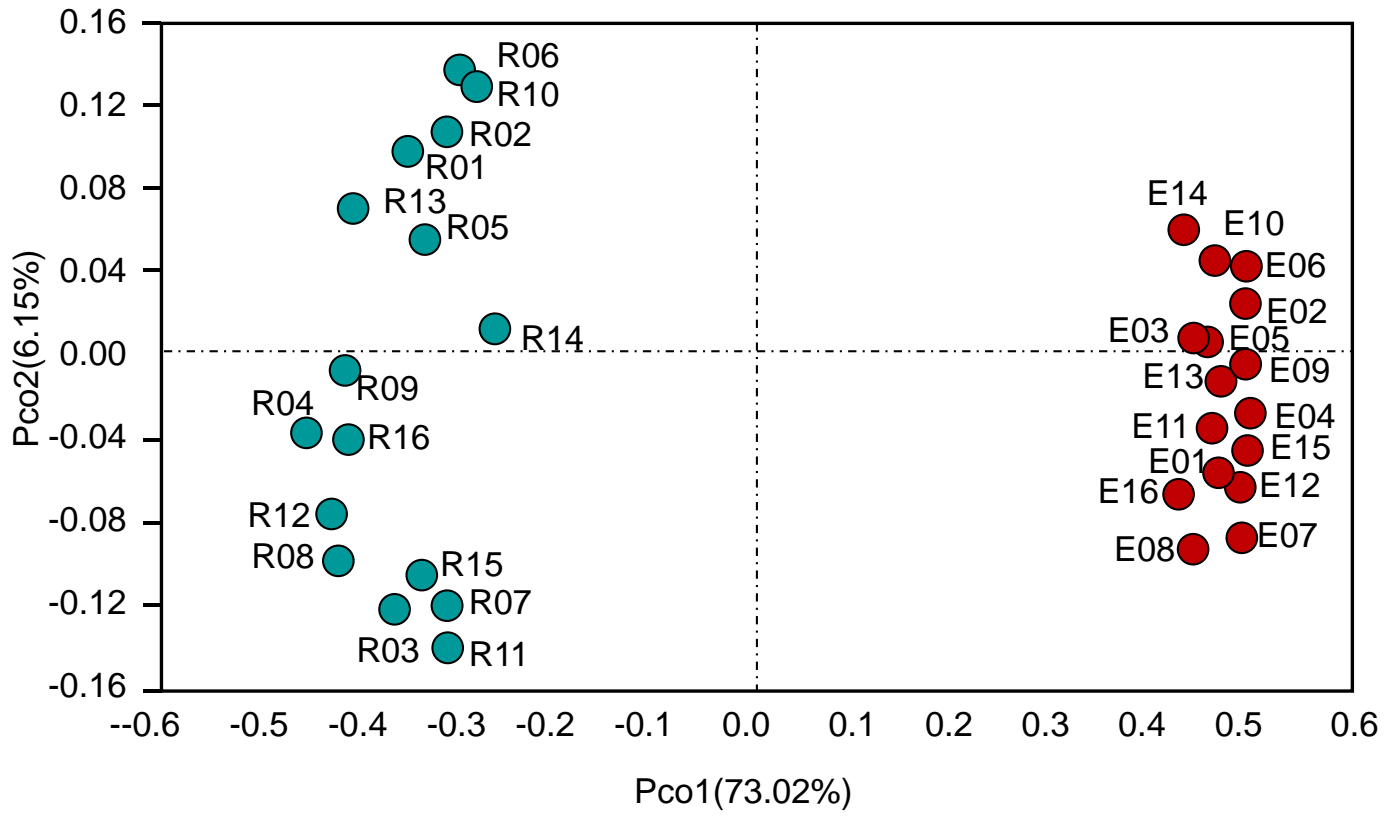

**Figure S2** Similarity of the rhizosphere and endosphere samples based on ASVs composition. Principal coordinate analysis (PCoA) was performed based on Bray-Curtis method.

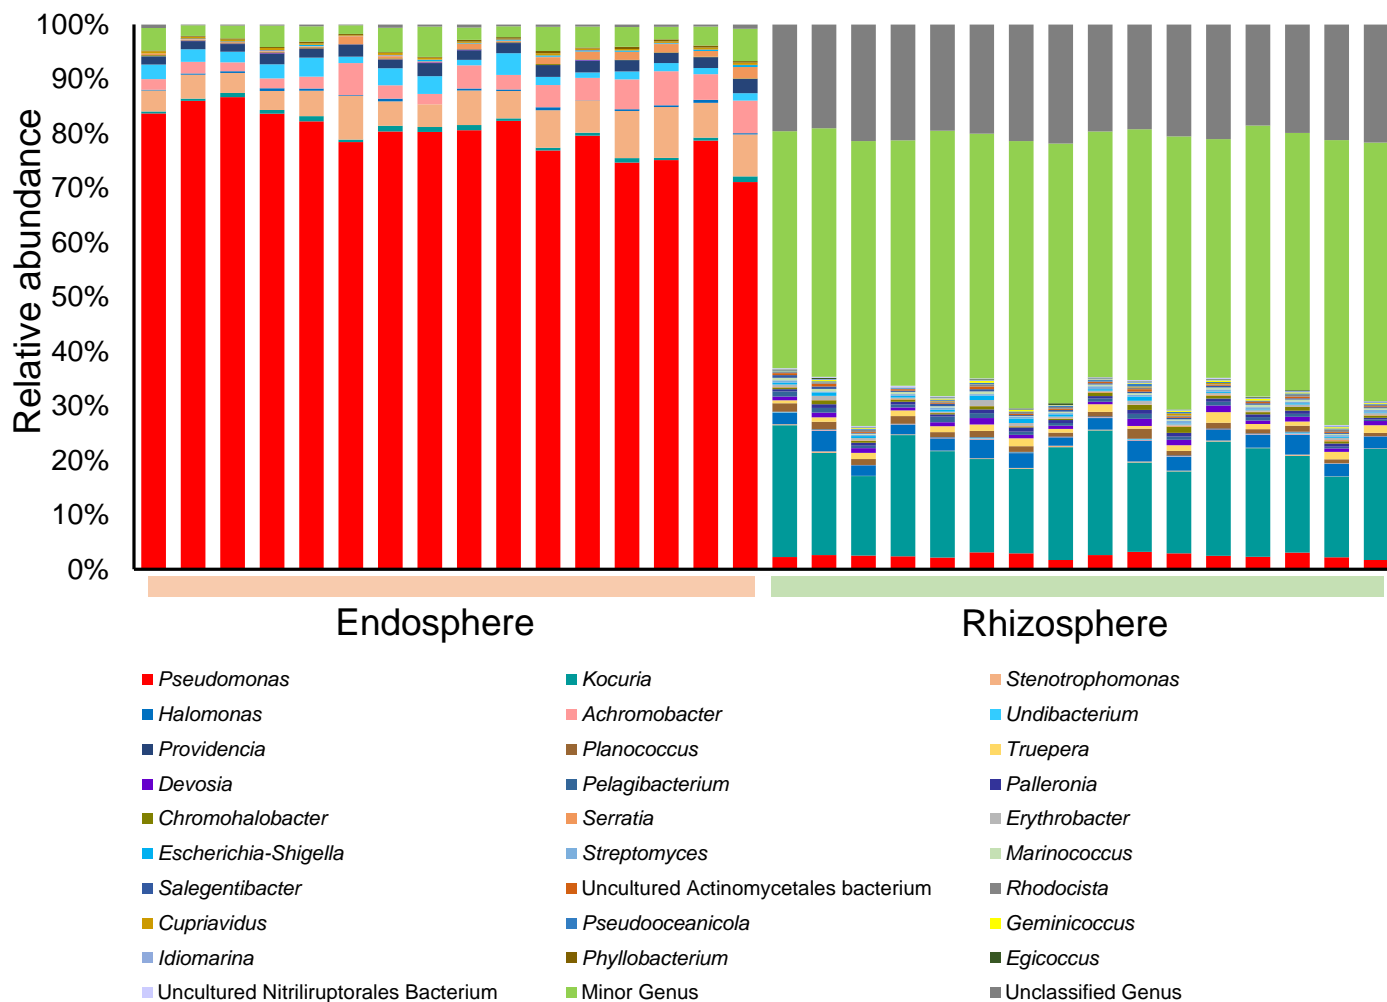

**Figure S3** Comparison of the microbial community composition at the genus level between different samples. The 30 most abundant genera are listed while other genera are grouped together as “Minor genus”, and their cumulative abundances are listed. Total relative abundances of the genera and differences between the rhizosphere and endosphere are listed in Table S4.

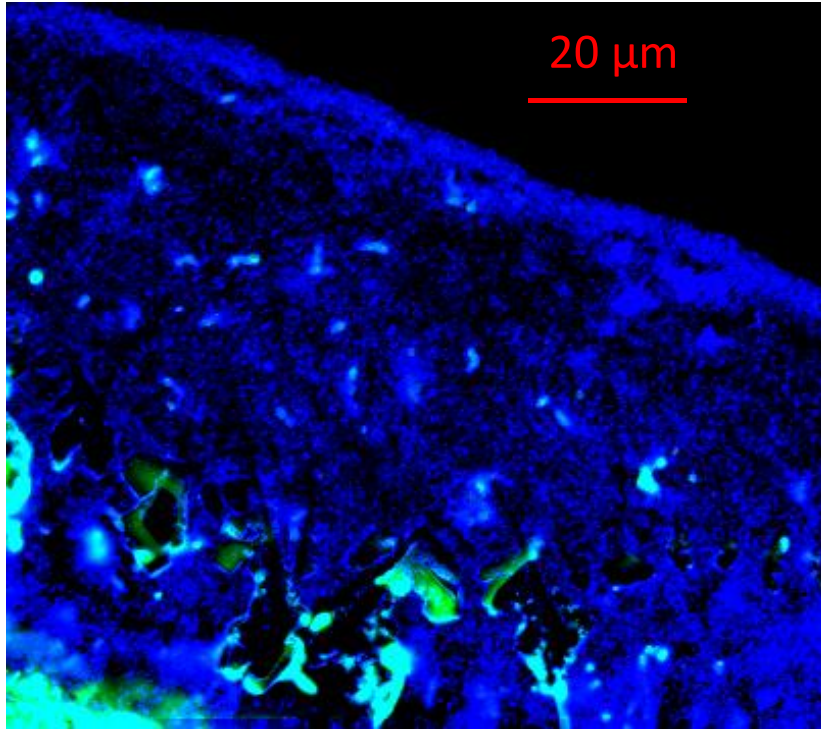

**Figure S4** Confocal micrograph of the section of wheat root. Green: *Pseudomonas* sp. LTGT-11-2Z; Blue: root cells.

**Table S1** Information of 16S rRNA gene amplicon sequences.

| <b>Sample</b> | <b>Dataset</b> | <b>Total number of reads</b> | <b>Total number of high-quality reads</b> | <b>Percentage of high-quality reads</b> | <b>High-quality reads after assembly and removal of chloroplast and mitochondrion</b> |
|---------------|----------------|------------------------------|-------------------------------------------|-----------------------------------------|---------------------------------------------------------------------------------------|
| R01           | LTCT-1-1       | 259,440                      | 229,013                                   | 88.27%                                  | 198,262                                                                               |
|               | LTCT-1-2       | 259,440                      | 229,013                                   | 88.27%                                  |                                                                                       |
| R02           | LTCT-2-1       | 267,571                      | 243,452                                   | 90.99%                                  | 218,496                                                                               |
|               | LTCT-2-2       | 267,571                      | 243,452                                   | 90.99%                                  |                                                                                       |
| R03           | LTCT-3-1       | 203,654                      | 185,355                                   | 91.01%                                  | 167,811                                                                               |
|               | LTCT-3-2       | 203,654                      | 185,355                                   | 91.01%                                  |                                                                                       |
| R04           | LTCT-4-1       | 244,911                      | 227,494                                   | 92.89%                                  | 210,218                                                                               |
|               | LTCT-4-2       | 244,911                      | 227,494                                   | 92.89%                                  |                                                                                       |
| R05           | LTCT-5-1       | 245,133                      | 215,321                                   | 87.84%                                  | 187,872                                                                               |
|               | LTCT-5-2       | 245,133                      | 215,321                                   | 87.84%                                  |                                                                                       |
| R06           | LTCT-6-1       | 213,070                      | 193,275                                   | 90.71%                                  | 173,993                                                                               |
|               | LTCT-6-2       | 213,070                      | 193,275                                   | 90.71%                                  |                                                                                       |
| R07           | LTCT-7-1       | 230,009                      | 210,474                                   | 91.51%                                  | 191,462                                                                               |
|               | LTCT-7-2       | 230,009                      | 210,474                                   | 91.51%                                  |                                                                                       |
| R08           | LTCT-8-1       | 195,274                      | 180,844                                   | 92.61%                                  | 166,772                                                                               |
|               | LTCT-8-2       | 195,274                      | 180,844                                   | 92.61%                                  |                                                                                       |
| R09           | LTCT-9-1       | 241,266                      | 212,151                                   | 87.93%                                  | 183,611                                                                               |
|               | LTCT-9-2       | 241,266                      | 212,151                                   | 87.93%                                  |                                                                                       |
| R10           | LTCT-10-1      | 224,643                      | 204,821                                   | 91.18%                                  | 184,057                                                                               |
|               | LTCT-10-2      | 224,643                      | 204,821                                   | 91.18%                                  |                                                                                       |
| R11           | LTCT-11-1      | 198,239                      | 180,157                                   | 90.88%                                  | 162,459                                                                               |
|               | LTCT-11-2      | 198,239                      | 180,157                                   | 90.88%                                  |                                                                                       |
| R12           | LTCT-12-1      | 228,477                      | 212,622                                   | 93.06%                                  | 196,702                                                                               |
|               | LTCT-12-2      | 228,477                      | 212,622                                   | 93.06%                                  |                                                                                       |

|     |           |         |         |        |         |
|-----|-----------|---------|---------|--------|---------|
| R13 | LTCT-13-1 | 291,814 | 255,874 | 87.68% | 220,248 |
|     | LTCT-13-2 | 291,814 | 255,874 | 87.68% |         |
| R14 | LTCT-14-1 | 265,672 | 240,461 | 90.51% | 214,224 |
|     | LTCT-14-2 | 265,672 | 240,461 | 90.51% |         |
| R15 | LTCT-15-1 | 248,288 | 223,175 | 89.89% | 200,153 |
|     | LTCT-15-2 | 248,288 | 223,175 | 89.89% |         |
| R16 | LTCT-16-1 | 227,716 | 210,857 | 92.60% | 194,084 |
|     | LTCT-16-2 | 227,716 | 210,857 | 92.60% |         |
| E01 | LTCG-1-1  | 191,996 | 165,992 | 86.46% | 123,848 |
|     | LTCG-1-2  | 191,996 | 165,992 | 86.46% |         |
| E02 | LTCG-2-1  | 163,832 | 146,658 | 89.52% | 119,295 |
|     | LTCG-2-2  | 163,832 | 146,658 | 89.52% |         |
| E03 | LTCG-3-1  | 150,272 | 150,272 | 90.42% | 113,513 |
|     | LTCG-3-2  | 150,272 | 150,272 | 90.42% |         |
| E04 | LTCG-4-1  | 170,136 | 155,555 | 91.43% | 129,254 |
|     | LTCG-4-2  | 170,136 | 155,555 | 91.43% |         |
| E05 | LTCG-5-1  | 209,945 | 180,676 | 86.06% | 125,833 |
|     | LTCG-5-2  | 209,945 | 180,676 | 86.06% |         |
| E06 | LTCG-6-1  | 189,371 | 169,340 | 89.42% | 136,394 |
|     | LTCG-6-2  | 189,371 | 169,340 | 89.42% |         |
| E07 | LTCG-7-1  | 168,345 | 151,421 | 89.95% | 125,292 |
|     | LTCG-7-2  | 168,345 | 151,421 | 89.95% |         |
| E08 | LTCG-8-1  | 149,507 | 137,396 | 91.90% | 112,844 |
|     | LTCG-8-2  | 149,507 | 137,396 | 91.90% |         |
| E09 | LTCG-9-1  | 206,122 | 179,754 | 87.21% | 117,370 |
|     | LTCG-9-2  | 206,122 | 179,754 | 87.21% |         |
| E10 | LTCG-10-1 | 184,289 | 164,671 | 89.35% | 127,303 |
|     | LTCG-10-2 | 184,289 | 164,671 | 89.35% |         |
| E11 | LTCG-11-1 | 169,008 | 152,135 | 90.02% | 125,858 |
|     | LTCG-11-2 | 169,008 | 152,135 | 90.02% |         |

|     |           |         |         |        |         |
|-----|-----------|---------|---------|--------|---------|
| E12 | LTCG-12-1 | 173,109 | 158,237 | 91.41% | 125,305 |
|     | LTCG-12-2 | 173,109 | 158,237 | 91.41% |         |
| E13 | LTCG-13-1 | 207,974 | 180,854 | 86.96% | 116,804 |
|     | LTCG-13-2 | 207,974 | 180,854 | 86.96% |         |
| E14 | LTCG-14-1 | 203,749 | 203,749 | 89.39% | 142,586 |
|     | LTCG-14-2 | 203,749 | 203,749 | 89.39% |         |
| E15 | LTCG-15-1 | 150,123 | 136,280 | 90.78% | 115,087 |
|     | LTCG-15-2 | 150,123 | 136,280 | 90.78% |         |
| E16 | LTCG-16-1 | 159,298 | 145,618 | 91.41% | 113,608 |
|     | LTCG-16-2 | 159,298 | 145,618 | 91.41% |         |

---

**Table S2** Community richness and diversity estimates based on ASVs cluster. Values represent averages ( $\pm$  standard deviation) of 16 biological replicates per sample. Significant differences in the variance of root rhizosphere and endosphere were evaluated with two-tailed Student's t-test.

| <b>Richness and diversity indices</b> | <b>Rhizosphere</b>     | <b>Endosphere</b>     | <b><i>P</i></b> |
|---------------------------------------|------------------------|-----------------------|-----------------|
| Chao1                                 | 1277.440 $\pm$ 197.639 | 233.244 $\pm$ 208.502 | 2.05191E-16     |
| ACE                                   | 1258.870 $\pm$ 181.802 | 180.653 $\pm$ 62.653  | 5.81710E-22     |
| Observed ASVs                         | 1219.190 $\pm$ 165.383 | 130.875 $\pm$ 11.887  | 4.71400E-24     |
| Shannon_H                             | 6.559 $\pm$ 0.136      | 3.179 $\pm$ 0.137     | 1.95673E-37     |
| Simpson                               | 0.996 $\pm$ 0.001      | 0.929 $\pm$ 0.010     | 1.05080E-23     |



**Table S3** 16S rRNA gene sequences assigned at the phylum level. Values represent the average relative % abundance of ASVs among the 16 *A. sparsifolia* plants and the standard deviations (SDs). Intergroup significant differences were evaluated with two-tailed Student's t-test, and the *P* values were adjusted by Benjamini-Hochberg correction.

| Phyla                       | Rhizosphere         |        | Endosphere          |        | <i>P</i>    |
|-----------------------------|---------------------|--------|---------------------|--------|-------------|
|                             | % abundance of ASVs | SD (%) | % abundance of ASVs | SD (%) |             |
| Alphaproteobacteria         | 16.337              | 1.589  | 1.651               | 0.659  | 1.41275E-25 |
| Deltaproteobacteria         | 3.239               | 0.654  | 0.003               | 0.001  | 9.27629E-19 |
| Gammaproteobacteria         | 16.107              | 2.000  | 96.390              | 1.214  | 1.51293E-43 |
| Unclassified Proteobacteria | 0.001               | 0.005  | 0.012               | 0.013  | 0.00582213  |
| Acidobacteria               | 0.338               | 0.191  | 0.000               | 0.000  | 7.57978E-08 |
| Actinobacteria              | 33.442              | 2.782  | 0.893               | 0.331  | 1.64342E-29 |
| Armatimonadetes             | 0.012               | 0.024  | 0.016               | 0.042  | 0.743493456 |
| Bacteroidetes               | 9.777               | 0.870  | 0.367               | 0.153  | 2.11343E-28 |
| BRC1                        | 0.149               | 0.115  | 0.000               | 0.000  | 1.36041E-05 |
| Chlamydiae                  | 0.043               | 0.063  | 0.000               | 0.000  | 0.010511692 |
| Chloroflexi                 | 1.721               | 0.567  | 0.000               | 0.000  | 4.17927E-13 |
| Cyanobacteria               | 0.245               | 0.142  | 0.004               | 0.013  | 1.87796E-07 |
| Deinococcus_Thermus         | 1.243               | 0.400  | 0.003               | 0.008  | 2.50466E-13 |
| Elusimicrobia               | 0.003               | 0.013  | 0.000               | 0.000  | 0.325308615 |
| Euryarchaeota               | 0.112               | 0.126  | 0.000               | 0.000  | 0.001236066 |
| FBP                         | 0.013               | 0.041  | 0.000               | 0.000  | 0.218933142 |
| Firmicutes                  | 9.588               | 1.305  | 0.619               | 0.274  | 1.45377E-22 |
| Fusobacteria                | 0.006               | 0.017  | 0.031               | 0.045  | 0.041914524 |
| Gemmatimonadetes            | 2.661               | 0.553  | 0.003               | 0.008  | 2.06821E-18 |
| Hydrogenedentes             | 0.008               | 0.030  | 0.000               | 0.000  | 0.32538615  |
| Nitrospirae                 | 0.034               | 0.048  | 0.000               | 0.000  | 0.008453303 |
| Patescibacteria             | 1.790               | 0.562  | 0.000               | 0.000  | 1.23912E-13 |
| Planctomycetes              | 2.373               | 1.332  | 0.000               | 0.000  | 6.31656E-08 |
| Tenericutes                 | 0.001               | 0.002  | 0.000               | 0.000  | 0.325308615 |

|                     |       |       |       |       |             |
|---------------------|-------|-------|-------|-------|-------------|
| Verrucomicrobia     | 0.624 | 0.471 | 0.000 | 0.000 | 1.00453E-05 |
| WPS_2               | 0.012 | 0.025 | 0.000 | 0.000 | 0.067206089 |
| WS2                 | 0.013 | 0.053 | 0.000 | 0.000 | 0.325308615 |
| Unclassified Phylum | 0.110 | 0.142 | 0.008 | 0.012 | 0.007732887 |

---

**Table S4** 16S rRNA gene sequences assigned at the genus level. Values represent the average relative % abundance of ASVs among the 16 *A. sparsifolia* plants and the standard deviations (SDs). Intergroup significant differences were evaluated with two-tailed Student's t-test, and the *P* values were adjusted by Benjamini-Hochberg correction.

| Genera                               | Rhizosphere         |        | Endosphere          |        | <i>P</i>    |
|--------------------------------------|---------------------|--------|---------------------|--------|-------------|
|                                      | % abundance of ASVs | SD (%) | % abundance of ASVs | SD (%) |             |
| <i>Pseudomonas</i>                   | 2.504               | 0.456  | 80.000              | 4.198  | 2.03422E-35 |
| <i>Kocuria</i>                       | 18.802              | 3.036  | 0.677               | 0.248  | 4.95807E-21 |
| <i>Stenotrophomonas</i>              | 0.1483              | 0.0718 | 5.816               | 1.879  | 4.92752E-13 |
| <i>Halomonas</i>                     | 2.545               | 0.737  | 0.306               | 0.179  | 8.26989E-13 |
| <i>Achromobacter</i>                 | 0.087               | 0.048  | 3.589               | 1.687  | 2.93418E-09 |
| <i>Undibacterium</i>                 | 0.075               | 0.064  | 2.099               | 0.979  | 3.25616E-09 |
| <i>Providencia</i>                   | 0.087               | 0.041  | 1.912               | 0.358  | 4.76316E-19 |
| <i>Planococcus</i>                   | 1.050               | 0.332  | 0.009               | 0.035  | 2.07003E-13 |
| <i>Truepera</i>                      | 1.079               | 0.369  | 0.002               | 0.007  | 1.15611E-12 |
| <i>Devosia</i>                       | 0.812               | 0.253  | 0.050               | 0.049  | 8.41536E-13 |
| <i>Pelagibacterium</i>               | 0.649               | 0.231  | 0.007               | 0.009  | 3.63753E-12 |
| <i>Palleronia</i>                    | 0.561               | 0.130  | 0.008               | 0.015  | 6.46803E-17 |
| <i>Chromohalobacter</i>              | 0.507               | 0.256  | 0.085               | 0.050  | 3.76602E-07 |
| <i>Serratia</i>                      | 0.103               | 0.051  | 0.831               | 0.664  | 0.000136564 |
| <i>Erythrobacter</i>                 | 0.445               | 0.222  | 0.045               | 0.056  | 9.0754E-08  |
| <i>Escherichia-Shigella</i>          | 0.374               | 0.242  | 0.139               | 0.117  | 0.001499749 |
| <i>Streptomyces</i>                  | 0.361               | 0.099  | 0.0017              | 0.004  | 4.84052E-15 |
| <i>Marinococcus</i>                  | 0.331               | 0.111  | 0.0019              | 0.008  | 8.53414E-13 |
| <i>Salegentibacter</i>               | 0.285               | 0.107  | 0.0250              | 0.029  | 1.99448E-10 |
| Uncultured Actinomycetales bacterium | 0.273               | 0.113  | 0.006               | 0.011  | 1.87314E-10 |
| <i>Rhodocista</i>                    | 0.264               | 0.105  | 0.006               | 0.014  | 8.42693E-11 |
| <i>Cupriavidus</i>                   | 0.066               | 0.115  | 0.303               | 0.083  | 2.17492E-07 |
| <i>Pseudoceanicola</i>               | 0.195               | 0.088  | 0.000               | 0.000  | 6.84696E-10 |

|                                        |        |       |       |       |             |
|----------------------------------------|--------|-------|-------|-------|-------------|
| <i>Geminicoccus</i>                    | 0.187  | 0.098 | 0.001 | 0.006 | 2.12858E-08 |
| <i>Idiomarina</i>                      | 0.179  | 0.058 | 0.002 | 0.007 | 5.20335E-13 |
| <i>Phyllobacterium</i>                 | 0.000  | 0.000 | 0.250 | 0.100 | 4.96669E-11 |
| <i>Egicoccus</i>                       | 0.129  | 0.064 | 0.005 | 0.015 | 1.94213E-08 |
| Uncultured Nitriliruptorales Bacterium | 0.127  | 0.093 | 0.000 | 0.000 | 5.61616E-06 |
| Minor Genus                            | 47.402 | 2.772 | 3.423 | 1.311 | 3.15107E-32 |
| Unclassified Genus                     | 20.375 | 1.049 | 0.403 | 0.183 | 1.07293E-35 |

---

**Table S5** Examination of plant growth promoting (PGP) and related activities of seven endophytic bacterial strains isolated from *A. sparsifolia* roots.

| Strain name | Species name<br>(% of similarity to strains in NCBI)       | Observable<br>PGP | Siderophore<br>production | Exopolysacc<br>haride<br>production | ACC<br>deaminase<br>activity | Growth in<br>5% NaCl | Growth in<br>20% PEG | Growth at<br>42°C |
|-------------|------------------------------------------------------------|-------------------|---------------------------|-------------------------------------|------------------------------|----------------------|----------------------|-------------------|
| LTGR-2      | <i>Serratia marcescens</i><br>(JMPQ01000005, 99.8)         | -                 | +                         | -                                   | -                            | +                    | +                    | +                 |
| LTGR-2-1Z   | <i>Stenotrophomonas maltophilia</i><br>(JALV01000036, 100) | -                 | +                         | -                                   | -                            | -                    | +                    | -                 |
| LTGR-13Z    | <i>Pseudoxanthomonas wuyuanensis</i><br>(JN247803, 100)    | -                 | +                         | -                                   | -                            | +                    | +                    | +                 |
| LTGR-20     | <i>Rhizobium massiliae</i><br>(AF531767, 100)              | -                 | -                         | +                                   | -                            | -                    | -                    | +                 |
| LTGPAF-12F  | <i>Pantoea dispersa</i><br>(DQ504305, 99.8)                | -                 | -                         | -                                   | -                            | +                    | +                    | -                 |
| LTGT-10     | <i>Acinetobacter oleivorans</i><br>(CP002080, 100)         | -                 | +                         | -                                   | -                            | +                    | +                    | +                 |
| LTGT-11-2Z  | <i>Pseudomonas</i> sp.<br>(BBIS01000088, 100)              | +                 | +                         | +                                   | +                            | +                    | +                    | +                 |

+, positive; -, negative.

**Table S6** General information of *Pseudomonas* sp. LTGT-11-2Z isolated from the root of *A. sparsifolia*.

|                 |            |
|-----------------|------------|
| Strain          | LTGT-11-2Z |
| Completeness    | 100%       |
| No. of contigs  | 1          |
| Genome size     | 6,073,276  |
| GC content      | 61.88%     |
| No. of genes    | 5,702      |
| No. of proteins | 5,608      |

**Table S7** Information of selected reference strains.

| <b>Strain</b>                                | <b>Host plant</b>                                                                           | <b>Functional role</b>                                                                                                                                  | <b>Reference</b> |
|----------------------------------------------|---------------------------------------------------------------------------------------------|---------------------------------------------------------------------------------------------------------------------------------------------------------|------------------|
| <i>Pseudomonas fluorescens</i> 2P24          | Wheat                                                                                       | Protecting plants against tomato bacterial wilt caused by <i>Ralstonia solanacearum</i> and cotton rhizoctoniosis caused by <i>Rhizoctonia solani</i> . | Ref. 1           |
| <i>Pseudomonas putida</i> MTCC5279           | Chickpea ( <i>Cicer arietinum</i> L.)                                                       | Promoting growth and drought stress in chickpea.                                                                                                        | Ref. 2           |
| <i>Klebsiella</i> sp. LTGPAF-6F              | Wheat                                                                                       | Improving growth and drought tolerance in wheat.                                                                                                        | Ref. 3           |
| <i>Serratia proteamaculans</i> 568           | Poplar                                                                                      | Promoting root development in poplar                                                                                                                    | Ref. 4           |
| <i>Burkholderia phytofirmans</i> PsJN        | <i>Glomus vesiculiferum</i> -infected onion roots, Potato, tomato, grapevine, maize, barley | Promoting endophytic colonization and plant growth of potatoes, canola, maize, grapevines, herbaceous and woody species.                                | Ref. 5, 6        |
| <i>Azospirillum</i> sp. B510                 | Rice ( <i>Oryza sativa</i> cv. Nipponbare)                                                  | Promoting rice growth under both laboratory and field conditions and improving nitrogen fixation in grass.                                              | Ref. 7           |
| <i>Klebsiella pneumoniae</i> 342             | Maize and wheat                                                                             | Improving endophytic colonization, nitrogen fixation and plant growth in host plant.                                                                    | Ref. 8           |
| <i>Methylobacterium populi</i> BJ001         | Poplar                                                                                      | Improving endophytic colonization in poplar.                                                                                                            | Ref. 6           |
| <i>Pseudomonas putida</i> W619               | Poplar                                                                                      | Improving endophytic colonization in poplar.                                                                                                            | Ref. 4           |
| <i>Enterobacter</i> sp. 638                  | Poplar                                                                                      | Improving root development and endophytic colonization in poplar.                                                                                       | Ref. 9           |
| <i>Pseudomonas stutzeri</i> A1501            | Wheat                                                                                       | Improving plant growth and nitrogen fixation in host plant.                                                                                             | Ref. 10          |
| <i>Azoarcus</i> sp. BH72                     | Kallar grass, rice                                                                          | Improving endophytic colonization and nitrogen fixation in grass and rice.                                                                              | Ref. 11          |
| <i>Gluconacetobacter diazotrophicus</i> Pal5 | Sugarcane, rice                                                                             | Improving plant growth and nitrogen fixation in host plant.                                                                                             | Ref. 12          |

**Table S8** Functions relevant for rhizosphere competence, plant colonization, plant growth promotion and stress resistance in *Pseudomonas* sp. LTGT-11-2Z and reference bacteria. Full names: *Pseudomonas* sp. LTGT-11-2Z; *Pseudomonas fluorescens* 2P24, *Pseudomonas putida* MTCC5279; *Klebsiella* sp. LTGPAF-6F; *Serratia proteamaculans* 568; *Burkholderia phytofirmans* PsJN; *Azospirillum* sp. B510; *Klebsiella pneumoniae* 342; *Methylobacterium populi* BJ001; *Pseudomonas putida* W619; *Enterobacter* sp. 638; *Pseudomonas stutzeri* A1501; *Azoarcus* sp. BH72; *Gluconacetobacter diazotrophicus* Pal5.

| Functions                        | LTGT   |      | WTC   | LTGP  |     |      | ABH7 |     |       |      |     |       |    |      |
|----------------------------------|--------|------|-------|-------|-----|------|------|-----|-------|------|-----|-------|----|------|
|                                  | -11-2Z | 2P24 | C5279 | AF-6F | 568 | PsJN | B510 | 342 | BJ001 | W619 | 638 | A1501 | 2  | Pal5 |
| <b>Motility and chemotaxis</b>   |        |      |       |       |     |      |      |     |       |      |     |       |    |      |
| Type IV pili                     | -      | +    | -     | +     | -   | +    | +    | +   | +     | +    | +   | -     | +  | +    |
| Flagella                         | +      | +    | +     | +     | +   | +    | +    | -   | +     | +    | +   | +     | +  | +    |
| Chemotaxis                       | +      | +    | +     | +     | +   | +    | +    | -   | +     | +    | +   | +     | +  | +    |
| Methyl-accepting proteins        | 25     | 40   | 31    | 2     | 3   | 27   | 88   | 0   | 28    | 33   | 18  | 33    | 24 | 9    |
| Che protein response regulator   | 7      | 2    | 3     | 6     | 10  | 60   | 71   | 25  | 73    | 44   | 26  | 47    | 51 | 12   |
| <b>Plant adhesion</b>            |        |      |       |       |     |      |      |     |       |      |     |       |    |      |
| Curli fibers                     | 1      | 0    | 0     | 0     | 1   | 0    | 0    | 0   | 2     | 5    | 5   | 7     | 0  | 0    |
| Haemagglutinin protein           | 0      | 0    | 6     | 0     | 0   | 1    | 0    | 2   | 0     | 1    | 1   | 0     | 0  | 0    |
| Agglutination protein            | 0      | 0    | 0     | 0     | 0   | 0    | 0    | 0   | 0     | 2    | 0   | 0     | 1  | 0    |
| <b>Plant polymer degradation</b> |        |      |       |       |     |      |      |     |       |      |     |       |    |      |
| Glycoside hydrolases (GH) total  | 222    | 247  | 88    | 104   | 70  | 41   | 49   | 68  | 26    | 26   | 56  | 29    | 29 | 35   |
| <b>Detoxification</b>            |        |      |       |       |     |      |      |     |       |      |     |       |    |      |
| Glutathione S-transferase        | 10     | 20   | 9     | 9     | 11  | 24   | 11   | 12  | 16    | 12   | 9   | 8     | 10 | 9    |
| Alkyl hydroperoxide reductase    | 1      | 4    | 4     | 1     | 0   | 2    | 1    | 1   | 0     | 1    | 1   | 2     | 1  | 1    |
| Thiol peroxidase                 | 1      | 1    | 1     | 1     | 1   | 1    | 0    | 1   | 0     | 1    | 1   | 1     | 1  | 0    |
| Glutathione peroxidase           | 3      | 3    | 5     | 1     | 2   | 1    | 1    | 2   | 2     | 3    | 2   | 3     | 2  | 1    |
| Catalase-peroxidase              | 1      | 1    | 1     | 1     | 1   | 1    | 0    | 1   | 0     | 1    | 1   | 1     | 1  | 0    |
| SOD                              | 2      | 2    | 2     | 2     | 2   | 2    | 2    | 3   | 2     | 3    | 3   | 2     | 2  | 1    |
| Catalases                        | 2      | 0    | 0     | 2     | 2   | 6    | 2    | 4   | 6     | 4    | 5   | 2     | 2  | 3    |
| Peroxidase                       | 3      | 11   | 13    | 2     | 2   | 5    | 2    | 4   | 1     | 4    | 4   | 3     | 4  | 4    |
| SUM antioxidative enzyme         | 23     | 29   | 35    | 19    | 21  | 21   | 8    | 18  | 11    | 18   | 19  | 14    | 14 | 12   |
| Efflux pumps                     | 27     | 25   | 19    | 27    | 17  | 56   | 11   | 49  | 40    | 45   | 35  | 29    | 20 | 31   |



|                                     |    |     |     |     |     |     |     |     |     |     |     |     |     |    |
|-------------------------------------|----|-----|-----|-----|-----|-----|-----|-----|-----|-----|-----|-----|-----|----|
| <b>Iron uptake</b>                  |    |     |     |     |     |     |     |     |     |     |     |     |     |    |
| Dicitrate TonB-dependent receptor   | 0  | 0   | 0   | 1   | 1   | 1   | 0   | 0   | 0   | 1   | 0   | 0   | 0   | 0  |
| Catecholate TonB-dependent receptor | 0  | 0   | 0   | 1   | 0   | 1   | 0   | 1   | 1   | 1   | 0   | 1   | 1   | 2  |
| Hydroxymate TonB-dependent receptor | 0  | 0   | 0   | 10  | 11  | 5   | 5   | 7   | 19  | 12  | 8   | 10  | 13  | 24 |
| SUM Ton-dependent receptors         | 0  | 0   | 0   | 12  | 12  | 7   | 5   | 8   | 20  | 14  | 8   | 11  | 14  | 26 |
| Siderophore biosynthesis            | +  | +   | -   | +   | +   | +   | +   | +   | -   | -   | +   | +   | -   | -  |
| <b>Compound degradation</b>         |    |     |     |     |     |     |     |     |     |     |     |     |     |    |
| Alkane monooxygenase                | 0  | 8   | 3   | 0   | 0   | 1   | 0   | 0   | 0   | 0   | 0   | 0   | 0   | 0  |
| Dioxygenases                        | 24 | 0   | 24  | 12  | 12  | 15  | 16  | 9   | 1   | 11  | 0   | 8   | 15  | 0  |
| <b>Transporter</b>                  |    |     |     |     |     |     |     |     |     |     |     |     |     |    |
| ABC transporter type                | 34 | 136 | 122 | 160 | 130 | 105 | 51  | 153 | 63  | 99  | 145 | 74  | 51  | 54 |
| ABC transporter gene                | 93 | 249 | 225 | 263 | 206 | 256 | 76  | 237 | 108 | 154 | 199 | 113 | 76  | 86 |
| Porin                               | 6  | 18  | 0   | 27  | 0   | 54  | 0   | 27  | 8   | 8   | 16  | 4   | 3   | 8  |
| Putrescine                          | +  | +   | +   | +   | +   | +   | -   | +   | +   | +   | +   | +   | -   | -  |
| Spermidine/putrescine               | +  | +   | +   | +   | -   | +   | +   | +   | +   | +   | +   | +   | -   | -  |
| <b>Secretion systems</b>            |    |     |     |     |     |     |     |     |     |     |     |     |     |    |
| Type I                              | +  | -   | +   | -   | -   | -   | +   | +   | +   | +   | +   | +   | +   | +  |
| Type II                             | +  | -   | +   | +   | +   | +   | -   | -   | +   | +   | +   | +   | +   | -  |
| Type III                            | +  | +   | +   | -   | -   | +   | -   | -   | -   | -   | -   | -   | -   | -  |
| Type IV                             | -  | +   | +   | +   | +   | +   | +   | +   | -   | -   | +   | -   | -   | +  |
| Type Va                             | -  | -   | -   | -   | -   | -   | -   | -   | -   | -   | -   | -   | -   | -  |
| Type Vb                             | -  | -   | -   | -   | -   | -   | -   | -   | -   | +   | -   | -   | -   | -  |
| Type VI                             | +  | -   | +   | +   | +   | +   | +   | +   | -   | +   | -   | -   | +   | -  |
| <b>Signaling</b>                    |    |     |     |     |     |     |     |     |     |     |     |     |     |    |
| Two component system genes          | 63 | 333 | 321 | 141 | 146 | 279 | 178 | 158 | 242 | 268 | 181 | 247 | 178 | 93 |
| ECF sigma factor                    | 31 | 17  | 14  | 17  | 22  | 40  | 23  | 19  | 18  | 619 | 18  | 28  | 24  | 18 |
| <b>Quorum sensing</b>               |    |     |     |     |     |     |     |     |     |     |     |     |     |    |
| AI-2                                | -  | -   | -   | -   | -   | -   | -   | +   | -   | -   | +   | -   | -   | -  |
| DSF-system                          | +  | -   | -   | +   | +   | -   | -   | -   | -   | -   | -   | -   | -   | -  |

|                                                     |   |   |   |   |   |   |   |   |   |   |   |   |   |   |
|-----------------------------------------------------|---|---|---|---|---|---|---|---|---|---|---|---|---|---|
| AHL (AI-1)                                          | + | + | + | - | - | + | + | - | + | - | - | - | - | + |
| LuxR (solo)                                         | - | + | + | - | - | + | + | + | - | + | + | - | - | - |
| AHL degradation                                     | - | + | - | - | - | - | + | + | - | + | - | - | - | - |
| <b>Plant growth promotion and stress resistance</b> |   |   |   |   |   |   |   |   |   |   |   |   |   |   |
| Nitrogen fixation                                   | - | - | + | + | - | - | + | + | - | - | - | + | + | + |
| ACC deaminase                                       | + | - | + | - | + | + | + | - | + | + | - | + | - | - |
| Acetoin and 2,3-butanediol production               | - | + | - | + | - | - | + | + | + | + | + | - | + | + |
| Spermidine/putrescine/cadaverine synthesis          | + | + | + | + | + | + | + | + | + | + | + | + | + | + |
| Trehalose synthesis                                 | - | + | + | + | - | - | - | + | - | - | + | + | - | + |

**Table S9** Unique KEGG genes in *Pseudomonas* sp. LTGT-11-2Z in comparison with the four reference strains, including *P. putida* W619, an endophytic bacterium of poplar trees; *P. stutzeri* A1501, a rice root-associated bacterium; *P. putida* MTCC5279, a positive plant growth promoting rhizobacteria in chick pea, and the phylogenetically close strain *P. fluorescens* 2P24.

---

|        |                                                                                                               |
|--------|---------------------------------------------------------------------------------------------------------------|
| K01252 | <i>entB, dhbB, vibB, mxcF</i> ; bifunctional isochorismate lyase / aryl carrier protein [EC:3.3.2.1 6.3.2.14] |
| K19595 | <i>gesA, mexP</i> ; membrane fusion protein, gold/copper resistance efflux system                             |
| K00202 | <i>fwdC, fmdC</i> ; formylmethanofuran dehydrogenase subunit C [EC:1.2.7.12]                                  |
| K16235 | <i>mmuP</i> ; S-methylmethionine transporter                                                                  |
| K16242 | <i>dmpN, poxD, tomA3</i> ; phenol/toluene 2-monooxygenase (NADH) P3/A3 [EC:1.14.13.244 1.14.13.243]           |
| K00054 | <i>mvaA</i> ; hydroxymethylglutaryl-CoA reductase [EC:1.1.1.88]                                               |
| K00634 | <i>ptb</i> ; phosphate butyryltransferase [EC:2.3.1.19]                                                       |
| K18650 | <i>pehX</i> ; exo-poly-alpha-galacturonosidase [EC:3.2.1.82]                                                  |
| K03208 | <i>wcaI</i> ; colanic acid biosynthesis glycosyl transferase WcaI                                             |
| K15343 | <i>sspH1</i> ; E3 ubiquitin-protein ligase SspH1                                                              |
| K07239 | heavy-metal exporter, HME family                                                                              |
| K16246 | <i>dmpP, poxF, tomA5</i> ; phenol/toluene 2-monooxygenase (NADH) P5/A5 [EC:1.14.13.244 1.14.13.243]           |
| K03772 | <i>fkpA</i> ; FKBP-type peptidyl-prolyl cis-trans isomerase FkpA [EC:5.2.1.8]                                 |
| K03148 | <i>thiF</i> ; sulfur carrier protein ThiS adenylyltransferase [EC:2.7.7.73]                                   |
| K01739 | <i>metB</i> ; cystathionine gamma-synthase [EC:2.5.1.48]                                                      |
| K07459 | <i>ybjD</i> ; putative ATP-dependent endonuclease of the OLD family                                           |
| K00876 | <i>udk</i> ; uridine kinase [EC:2.7.1.48]                                                                     |
| K00016 | <i>ldh</i> ; L-lactate dehydrogenase [EC:1.1.1.27]                                                            |
| K19176 | FAAH2; fatty acid amide hydrolase 2 [EC:3.5.1.99]                                                             |
| K19592 | <i>gols</i> ; MerR family transcriptional regulator, gold-responsive activator of gol and ges genes           |
| K16245 | <i>dmpO, poxE, tomA4</i> ; phenol/toluene 2-monooxygenase (NADH) P4/A4 [EC:1.14.13.244 1.14.13.243]           |
| K07316 | <i>mod</i> ; adenine-specific DNA-methyltransferase [EC:2.1.1.72]                                             |
| K20927 | <i>mpdB</i> ; 2-methyl-1,2-propanediol dehydrogenase [EC:1.1.1.400]                                           |
| K07494 | putative transposase                                                                                          |
| K18098 | <i>bjaR1, rpaR, rhiR</i> ; LuxR family transcriptional regulator, quorum-sensing system regulator BjaR1       |
| K16165 | <i>nagK</i> ; fumarylpyruvate hydrolase [EC:3.7.1.20]                                                         |
| K10947 | <i>padR</i> ; PadR family transcriptional regulator, regulatory protein PadR                                  |
| K01474 | <i>hyuB</i> ; N-methylhydantoinase B [EC:3.5.2.14]                                                            |
| K10857 | <i>exoX</i> ; exodeoxyribonuclease X [EC:3.1.11.-]                                                            |
| K13243 | <i>dos</i> ; c-di-GMP-specific phosphodiesterase [EC:3.1.4.52]                                                |
| K14257 | <i>ctcP, cts4, prnC</i> ; tetracycline 7-halogenase / FADH2 O2-dependent halogenase [EC:1.14.19.49 1.14.19.-] |
| K00183 | prokaryotic molybdopterin-containing oxidoreductase family, molybdopterin binding subunit                     |
| K16093 | <i>bacA</i> ; bacitracin synthase 1                                                                           |
| K07729 | putative transcriptional regulator                                                                            |
| K06324 | <i>cotA</i> ; spore coat protein A, manganese oxidase [EC:1.16.3.3]                                           |
| K12452 | <i>ascC, ddhC, rfbH</i> ; CDP-4-dehydro-6-deoxyglucose reductase, E1 [EC:1.17.1.1]                            |
| K11909 | <i>vasI</i> ; type VI secretion system protein VasI                                                           |

---

---

|        |                                                                                                                  |
|--------|------------------------------------------------------------------------------------------------------------------|
| K16249 | <i>dmpK, poxA, tomA0</i> ; phenol/toluene 2-monooxygenase (NADH) P0/A0                                           |
| K12991 | <i>rfbG</i> ; rhamnosyltransferase [EC:2.4.1.-]                                                                  |
| K11894 | <i>impI, vasC</i> ; type VI secretion system protein ImpI                                                        |
| K04782 | <i>pchB</i> ; isochorismate pyruvate lyase [EC:4.2.99.21]                                                        |
| K18334 | <i>fucD</i> ; L-fuconate dehydratase [EC:4.2.1.68]                                                               |
| K17716 | <i>capD</i> ; UDP-glucose 4-epimerase [EC:5.1.3.2]                                                               |
| K19597 | <i>golT</i> ; Au <sup>+</sup> -exporting ATPase [EC:3.6.1.-]                                                     |
| K16244 | <i>dmpM, poxC, tomA2</i> ; phenol/toluene 2-monooxygenase (NADH) P2/A2 [EC:1.14.13.244.14.13.243]                |
| K01473 | <i>hyuA</i> ; N-methylhydantoinase A [EC:3.5.2.14]                                                               |
| K01829 | protein disulfide-isomerase [EC:5.3.4.1]                                                                         |
| K19449 | <i>sinR</i> ; XRE family transcriptional regulator, master regulator for biofilm formation                       |
| K19171 | <i>dndD</i> ; DNA sulfur modification protein DndD                                                               |
| K02472 | <i>wecC</i> ; UDP-N-acetyl-D-mannosaminuronic acid dehydrogenase [EC:1.1.1.336]                                  |
| K16701 | <i>amsD</i> ; amylovoran biosynthesis glycosyltransferase AmsD [EC:2.4.-.-]                                      |
| K02849 | <i>waaQ, rfaQ</i> ; heptosyltransferase III [EC:2.4.-.-]                                                         |
| K06400 | <i>spoIVCA</i> ; site-specific DNA recombinase                                                                   |
| K19594 | <i>gesB, mexQ</i> ; gold/copper resistance efflux pump                                                           |
| K05797 | <i>pchF</i> ; 4-cresol dehydrogenase (hydroxylating) flavoprotein subunit [EC:1.17.9.1]                          |
| K18983 | <i>gci</i> ; D-galactarolactone cycloisomerase [EC:5.5.1.27]                                                     |
| K19425 | <i>epsH</i> ; glycosyltransferase EpsH [EC:2.4.-.-]                                                              |
| K03718 | <i>asnC</i> ; Lrp/AsnC family transcriptional regulator, regulator for <i>asnA</i> , <i>asnC</i> and <i>gidA</i> |
| K03420 | <i>psmR</i> ; proteasome regulatory subunit                                                                      |
| K16243 | <i>dmpL, poxB, tomA1</i> ; phenol/toluene 2-monooxygenase (NADH) P1/A1 [EC:1.14.13.244 1.14.13.243]              |
| K06996 | uncharacterized protein                                                                                          |
| K03765 | <i>cadC</i> ; transcriptional activator of <i>cad</i> operon                                                     |
| K15521 | <i>mshA</i> ; D-inositol-3-phosphate glycosyltransferase [EC:2.4.1.250]                                          |

---

## Reference

1. Wei HL, Wang Y, Zhang LQ, Tang W. 2004. Identification and characterization of biocontrol bacterial strain 2P24 and CPF-10. *Acta Phytopathol Sin* **34**:80–85.
2. Tiwari S, Lata C, Chauhan PS, Nautiyal CS. 2016. *Pseudomonas putida* attunes morphophysiological, biochemical and molecular responses in *Cicer arietinum* L. during drought stress and recovery. *Plant Physiol Biochem* **99**:108–117.
3. Zhang L, Zhong J, Liu H, Xin K, Chen C, Li Q, Wei Y, Wang Y, Chen F, Shen X. 2017. Complete genome sequence of the drought resistance-promoting endophyte *Klebsiella* sp. LTGPAF-6F. *J Biotechnol* **246**:36–39.
4. Taghavi S, Garafola C, Monchy S, Newman L, Hoffman A, Weyens N, et al. (2009) Genome survey and characterization of endophytic bacteria exhibiting a beneficial effect on growth and development of poplar trees. *Appl Environ Microbiol* **75**:748–757.
5. Weilharter A, Mitter B, Shin MW, Chain PS, Nowak J, Sessitsch A. 2011. Complete genome sequence of the plant-growth promoting endophyte *Burkholderia phytofirmans* strain PsJN. *J Bacteriol* **193**:3383–3384.
6. Mitter B, Petric A, Shin MW, Chain PSG, Hauberg-Lotte L, Reinhold-Hurek B, Nowak J, Sessitsch A. 2013. Comparative genome analysis of *Burkholderia phytofirmans* PsJN reveals a wide spectrum of endophytic lifestyles based on interaction strategies with host plants. *Front Plant Sci* **4**:120.
7. Kaneko T, Minamisawa K, Isawa T, Nakatsukasa H, Mitsui H, Kawaharada Y, Nakamura Y, Watanabe A, Kawashima K, Ono A, Shimizu Y, Takahashi C, Minami C, Fujishiro T, Kohara M, Katoh M, Nakazaki N, Nakayama S, Yamada M, Tabata S, Sato S. 2010. Complete genomic structure of the cultivated rice endophyte *Azospirillum* sp. B510. *DNA Res* **17**:37–50.
8. Fouts DE, Tyler HL, De Boy RT, Daugherty S, Ren Q, Badger JH, Durkin AS, Huot H, Shrivastava S, Kothari S, Dodson RJ, Mohamoud Y, Khouri H, Roesch LF, Krogfelt KA, Struve C, Triplett EW, Methé BA. 2008. Complete genome sequence of the N<sub>2</sub>-fixing broad host range endophyte *Klebsiella pneumoniae* 342 and virulence predictions verified in mice. *PLoS Genet* **47**:e1000141.
9. Taghavi S, van der Lelie D, Hoffman A, Zhang YB, Walla MD, Vangronsveld J, Newman L, Monchy S. 2010. Genome sequence of the plant growth promoting endophytic bacterium *Enterobacter* sp. 638. *PLoS Genet* **6**:e1000943.
10. Yan Y, Yang J, Dou Y, Chen M, Ping S, Peng J, Lu W, Zhang W, Yao Z, Li H, Liu W, He S, Geng L, Zhang X, Yang F, Yu H, Zhan Y, Li D, Lin Z, Wang Y, Elmerich C, Lin M, Jin Q. 2008. Nitrogen fixation island and

rhizosphere competence traits in the genome of root-associated *Pseudomonas stutzeri* A1501. *Proc Natl Acad Sci* **105**:7564–7569.

11. Krause A, Rajkumar A, Bartels D, Battistoni F, Bekel T, Boch J, Böhm M, Friedrich F, Hurek T, Krause L, Linke B, McHardy AC, Sarkar A, Schneiker S, Syed AA, Thauer R, Vorhölter FJ, Weidner S, Pühler A, Reinhold-Hurek B, Kaiser O, Goesmann A. 2006. Complete genome of the mutualistic, N<sub>2</sub>-fixing grass endophyte *Azoarcus* sp. strain BH72. *Nat Biotechnol* **24**:1385–1391.
12. Bertalan M, Albano R, de Padua V, Rouws L, Rojas C, Hemerly A, Teixeira K, Schwab S, Araujo J, Oliveira A, França L, Magalhães V, Alquéres S, Cardoso A, Almeida W, Loureiro MM, Nogueira E, Cidade D, Oliveira D, Simão T, Macedo J, Valadão A, Dreschsel M, Freitas F, Vidal M, Guedes H, Rodrigues E, Meneses C, Brioso P, Pozzer L, Figueiredo D, Montano H, Junior J, Filho GS, Flores VMQ, Ferreira B, Branco A, Gonzalez P, Guillobel H, Lemos M, Seibel L, Macedo J, Alves-Ferreira M, Sachetto-Martins G, Coelho A, Santos E, Amaral G, Neves A, Pacheco AB, Carvalho D, Lery L, Bisch P, Rössle RC, Ürményi T, Pereira AR, Silva R, Rondinelli E, von Krüger W, Martins O, Baldani JI, Ferreira PCG. 2009. Complete genome sequence of the sugarcane nitrogen-fixing endophyte *Gluconacetobacter diazotrophicus* Pal5. *BMC Genomics* **10**:450.
